# Supplementary material for: The Prognostic Utilities of Various Risk Factors for Laryngeal Squamous Cell Carcinoma: A Systematic Review and Meta-Analysis
Source: MDPI journal article supplement (doi:10.3390/medicina59030497), 2023-03-02
Supplement: s1 [file s1]

**Table S2. The methodological quality of the included studies.**

| Study (year)       | Selection <sup>a</sup> |     |     |     | Comparability <sup>b</sup> |     | Exposure <sup>c</sup> |     |     | The<br>Newcastle-<br>Ottawa Scale |
|--------------------|------------------------|-----|-----|-----|----------------------------|-----|-----------------------|-----|-----|-----------------------------------|
|                    | 1                      | 2   | 3   | 4   | 5A                         | 5B  | 6                     | 7   | 8   |                                   |
| Nichols 2012       | Yes                    | Yes | Yes | Yes | No                         | No  | Yes                   | Yes | Yes | 7                                 |
| Dziegielewski 2012 | Yes                    | Yes | Yes | Yes | No                         | No  | Yes                   | Yes | Yes | 7                                 |
| Dionysopoulos 2013 | Yes                    | No  | No  | Yes | Yes                        | Yes | Yes                   | Yes | Yes | 7                                 |
| Zhang 2013         | Yes                    | Yes | Yes | Yes | No                         | No  | Yes                   | Yes | Yes | 7                                 |
| Timmermans 2015    | Yes                    | Yes | Yes | Yes | No                         | No  | Yes                   | Yes | Yes | 7                                 |
| Wong 2015          | Yes                    | No  | Yes | Yes | No                         | No  | Yes                   | Yes | Yes | 6                                 |
| Grover 2015        | Yes                    | No  | No  | Yes | Yes                        | Yes | Yes                   | Yes | Yes | 7                                 |
| Wang 2016          | Yes                    | No  | Yes | Yes | No                         | No  | Yes                   | Yes | Yes | 6                                 |
| Tu 2015            | Yes                    | No  | No  | Yes | Yes                        | Yes | Yes                   | Yes | Yes | 7                                 |
| Fu 2016            | Yes                    | Yes | Yes | Yes | No                         | No  | Yes                   | Yes | Yes | 7                                 |
| Graboyes 2017      | Yes                    | Yes | Yes | Yes | No                         | No  | Yes                   | Yes | Yes | 7                                 |
| Dyckhoff 2017      | Yes                    | No  | No  | Yes | Yes                        | Yes | Yes                   | Yes | Yes | 7                                 |
| Birkeland 2017     | Yes                    | Yes | Yes | Yes | No                         | No  | Yes                   | Yes | No  | 6                                 |
| Cheraghlo 2018     | Yes                    | Yes | Yes | Yes | No                         | No  | Yes                   | Yes | Yes | 7                                 |
| Chen 2018          | Yes                    | No  | No  | Yes | Yes                        | Yes | Yes                   | Yes | Yes | 7                                 |
| Oh 2019            | Yes                    | Yes | Yes | Yes | No                         | No  | Yes                   | Yes | No  | 6                                 |
| Patel 2019         | Yes                    | Yes | Yes | Yes | No                         | No  | Yes                   | Yes | Yes | 7                                 |
| Zhou 2019          | Yes                    | Yes | Yes | Yes | No                         | No  | Yes                   | Yes | Yes | 7                                 |

|                 |     |     |     |     |     |     |     |     |     |          |
|-----------------|-----|-----|-----|-----|-----|-----|-----|-----|-----|----------|
| Song 2019       | Yes | Yes | Yes | Yes | No  | No  | Yes | Yes | Yes | <b>7</b> |
| Bates 2019      | Yes | No  | Yes | Yes | No  | No  | Yes | Yes | Yes | <b>6</b> |
| Boukovalas 2020 | Yes | No  | No  | Yes | Yes | Yes | Yes | Yes | Yes | <b>7</b> |
| Zhang 2020      | Yes | Yes | Yes | Yes | No  | No  | Yes | Yes | No  | <b>6</b> |
| Lin 2021        | Yes | Yes | Yes | Yes | No  | No  | Yes | Yes | Yes | <b>7</b> |

---

A star rating system was used to indicate the quality of a study, with a maximum of nine stars. A study could be awarded a maximum of one star for each numbered item within the selection and exposure categories

a: Selection (4 items): adequacy of case definition; representativeness of the cases; selection of controls; and definition of controls.

b.: Comparability (1 item): comparability of cases and controls on the basis of the design or analysis.

c.: Exposure (3 items): ascertainment of exposure; same method of ascertainment for cases and controls; and non-response rate (same rate for both groups).
