# Supplementary material for: The Prognostic Utilities of Various Risk Factors for Laryngeal Squamous Cell Carcinoma: A Systematic Review and Meta-Analysis
Source: MDPI journal article supplement (doi:10.3390/medicina59030497), 2023-03-02
Supplement: s1 [file s1]

**Table S1. The characteristics of the included studies.**

| Study              | Design | Number | Age, median (range) or mean(SD), y | Sex (Male/Female) | Nation      | Laryngeal tumor stage | Extracted outcomes                                                                                                     |
|--------------------|--------|--------|------------------------------------|-------------------|-------------|-----------------------|------------------------------------------------------------------------------------------------------------------------|
| Nichols 2012       | Cohort | 75     | NA                                 | 66/9              | UK          | T1/T2                 | Age, gender, T stage, smoking, alcohol                                                                                 |
| Dziegielewski 2012 | Cohort | 258    | 64.2 (36-92)                       | 205/53            | Canada      | T3/T4a                | Treatment modality                                                                                                     |
| Dionysopoulos 2013 | Cohort | 289    | 63 (36-82)                         | 277/12            | Greece      | T1/T2/T3/T4           | Nodal involvement, tumor subsite                                                                                       |
| Zhang 2013         | Cohort | 205    | 61.8±10.6                          | 197/8             | China       | T1/T2/T3/T4           | Age, TMN stage, T stage, node involvement, tumor subsite, smoking, alcohol, Charlson score, pathologic differentiation |
| Timmermans 2015    | Cohort | 166    | 61.9 (11.3)                        | 124/42            | Netherlands | T3/T4                 | Treatment modality, Age, sex, T stage, node involvement                                                                |
| Wong 2015          | Cohort | 140    | 66 (36-92)                         | 121/19            | UK          | T1/T2/T3/T4           | Sex, age, smoking, node involvement, TMN stage                                                                         |
| Grover 2015        | Cohort | 969    | 59.2 (10.4)                        | 774/195           | USA         | T4a                   | Age, TMN stage, node involvement, Charlson score, tumor subsite                                                        |
| Wang 2016          | Cohort | 120    | 60.6±8.6                           | 118/2             | China       | T1/T2/T3/T4           | Age, smoking, alcohol, tumor subsite, T stage, node involvement, TMN stage, pathologic differentiation                 |
| Tu 2015            | Cohort | 141    | 59 (36-87)                         | 137/4             | China       | T1/T2/T3/T4           | T stage, node involvement                                                                                              |
| Fu 2016            | Cohort | 420    | 60±9.1 (33-84)                     | 413/7             | China       | T3/T4                 | Age, sex, smoking, alcohol, tumor subsite, T stage, node involvement, TMN stage, pathologic differentiation            |
| Graboyes 2017      | Cohort | 1460   | NA                                 | 531/143           | USA         | T3                    | Age, sex, Charlson score, tumor subsite, pathologic differentiation                                                    |
| Dyckhoff 2017      | Cohort | 769    | 61.9 (9.7)                         | 626/58            | Germany     | T4                    | Treatment modality, age, node involvement, tumor subsite, Charlson score                                               |

|                 |        |        |            |           |        |             |                                                                                                            |
|-----------------|--------|--------|------------|-----------|--------|-------------|------------------------------------------------------------------------------------------------------------|
| Birkeland 2017  | Cohort | 244    | NA         | 208/36    | USA    | T1/T2/T3/T4 | T stage                                                                                                    |
| Cheraghlo 2018  | Cohort | 726    | NA         | 528/198   | USA    | T1/T2       | Age, sex, Charlson score, tumor subsite, T stage, node involvement                                         |
| Chen 2018       | Cohort | 361    | 60 (35-87) | 353/8     | China  | T1/T2/T3/T4 | Age, sex, tumor subsite, T stage, node involvement, TMN stage, pathologic differentiation                  |
| Oh 2019         | Cohort | 329    | 62 (57-66) | 30/6      | Canada | T4a         | Treatment modality, age, alcohol, sex, node involvement                                                    |
| Patel 2019      | Cohort | 8703   | NA         | 6601/2102 | USA    | T2/T3/T4    | Age, sex, Charlson score, pathologic differentiation, T stage, node involvement, treatment modality        |
| Zhou 2019       | Cohort | 232    | 63 (39-81) | 192/40    | China  | T1/T2/T3/T4 | Age sex, smoking, alcohol, tumor subsite, T stage, node involvement, TMN stage, pathologic differentiation |
| Song 2019       | Cohort | 137    | NA         | 133/4     | China  | T1/T2/T3/T4 | Tumor subsite, age, pathologic differentiation                                                             |
| Bates 2019      | Cohort | 11,237 | NA         | 8472/3538 | USA    | T3/T4       | Age, sex, Charlson score, T stage, node involvement, treatment modality                                    |
| Boukovalas 2020 | Cohort | 362    | 64         | 294/68    | USA    | T1/T2/T3/T4 | Age, sex, T stage, node involvement ,smoking, alcohol                                                      |
| Zhang 2020      | Cohort | 207    | NA         | 198/9     | China  | T1/T2/T3/T4 | Age, sex, alcohol, smoking, pathologic differentiation, TMN stage , T stage, node involvement              |
| Lin 2021        | Cohort | 2094   | NA         | 1712/382  | China  | T1/T2/T3/T4 | Age, sex, pathologic differentiation, node involvement                                                     |

CRT; chemoradiation therapy, TL; total laryngectomy, RT; radiation therapy, HR; Hazard ratio.
